# Supplementary material for: Composition and Metabolic Potential of Fe(III)-Reducing Enrichment Cultures of Methanotrophic ANME-2a Archaea and Associated Bacteria
Source: MDPI journal article supplement (doi:10.3390/microorganisms11030555), 2023-02-22
Supplement: s1 [file s1]

Supplementary Table S2. Multiheme c-type cytochromes encoded in MAGs B4-03 and B4-04 (ANME-2a)

| B4-03      |          |            |                                         |                             | B4-04      |          |            |                                         |                             |
|------------|----------|------------|-----------------------------------------|-----------------------------|------------|----------|------------|-----------------------------------------|-----------------------------|
| Locus tag  | RAST     | Length, aa | Number of heme <i>c</i> -binding motifs | Predicted cellular location | Locus tag  | RAST     | Length, aa | Number of heme <i>c</i> -binding motifs | Predicted cellular location |
| MCL7415845 | peg.1740 | 1647       | 32                                      | TM                          | MCL7474958 | peg.2258 | 454        | 5                                       | TM                          |
| MCL7414464 | peg.875  | 368        | 16                                      | TM                          | MCL7476062 | peg.1456 | 423        | 8                                       | TM                          |
| MCL7414463 | peg.874  | 211        | 9                                       | TM                          | MCL7476351 | peg.1913 | 512        | 7                                       | TM                          |
| MCL7414598 | peg.176  | 373        | 16                                      | TM                          | MCL7475379 | peg.448  | 447        | 9                                       | TM                          |
| MCL7415930 | peg.2    | 334        | 6                                       | TM                          | MCL7475737 | peg.1028 | 304        | 11                                      | periplasm                   |
| MCL7415476 | peg.1339 | 481        | 6                                       | TM                          | MCL7474552 | peg.968  | 367        | 15                                      | TM                          |
| MCL7416150 | peg.651  | 1241       | 5                                       | cytoplasm                   | MCL7475773 | peg.1067 | 295        | 8                                       | periplasm                   |
| MCL7414804 | peg.467  | 313        | 10                                      | TM                          | MCL7474596 | peg.1273 | 1013       | 15                                      | TM                          |
|            |          |            |                                         |                             | MCL7475154 | peg.201  | 286        | 13                                      | TM                          |
|            |          |            |                                         |                             | MCL7475111 | peg.158  | 373        | 16                                      | TM                          |
|            |          |            |                                         |                             | MCL7475189 | peg.239  | 1860       | 13                                      | TM                          |
|            |          |            |                                         |                             | MCL7475280 | peg.338  | 836        | 17                                      | TM                          |
|            |          |            |                                         |                             | MCL7475211 | peg.262  | 2234       | 45                                      | TM                          |
|            |          |            |                                         |                             | MCL7474551 | peg.967  | 213        | 8                                       | TM                          |
|            |          |            |                                         |                             | MCL7475970 | peg.1271 | 1704       | 33                                      | TM                          |
|            |          |            |                                         |                             | MCL7475771 | peg.1065 | 198        | 4                                       | TM                          |
|            |          |            |                                         |                             | MCL7476502 | peg.2253 | 277        | 7                                       | cytoplasm                   |
|            |          |            |                                         |                             | MCL7474817 | peg.1999 | 310        | 10                                      | TM                          |
|            |          |            |                                         |                             | MCL7476338 | peg.1899 | 333        | 6                                       | TM                          |
|            |          |            |                                         |                             | MCL7474900 | peg.2144 | 1226       | 15                                      | TM                          |

\*TM – transmembrane
