# Supplementary material for: Composition and Metabolic Potential of Fe(III)-Reducing Enrichment Cultures of Methanotrophic ANME-2a Archaea and Associated Bacteria
Source: MDPI journal article supplement (doi:10.3390/microorganisms11030555), 2023-02-22
Supplement: s1 [file s1]

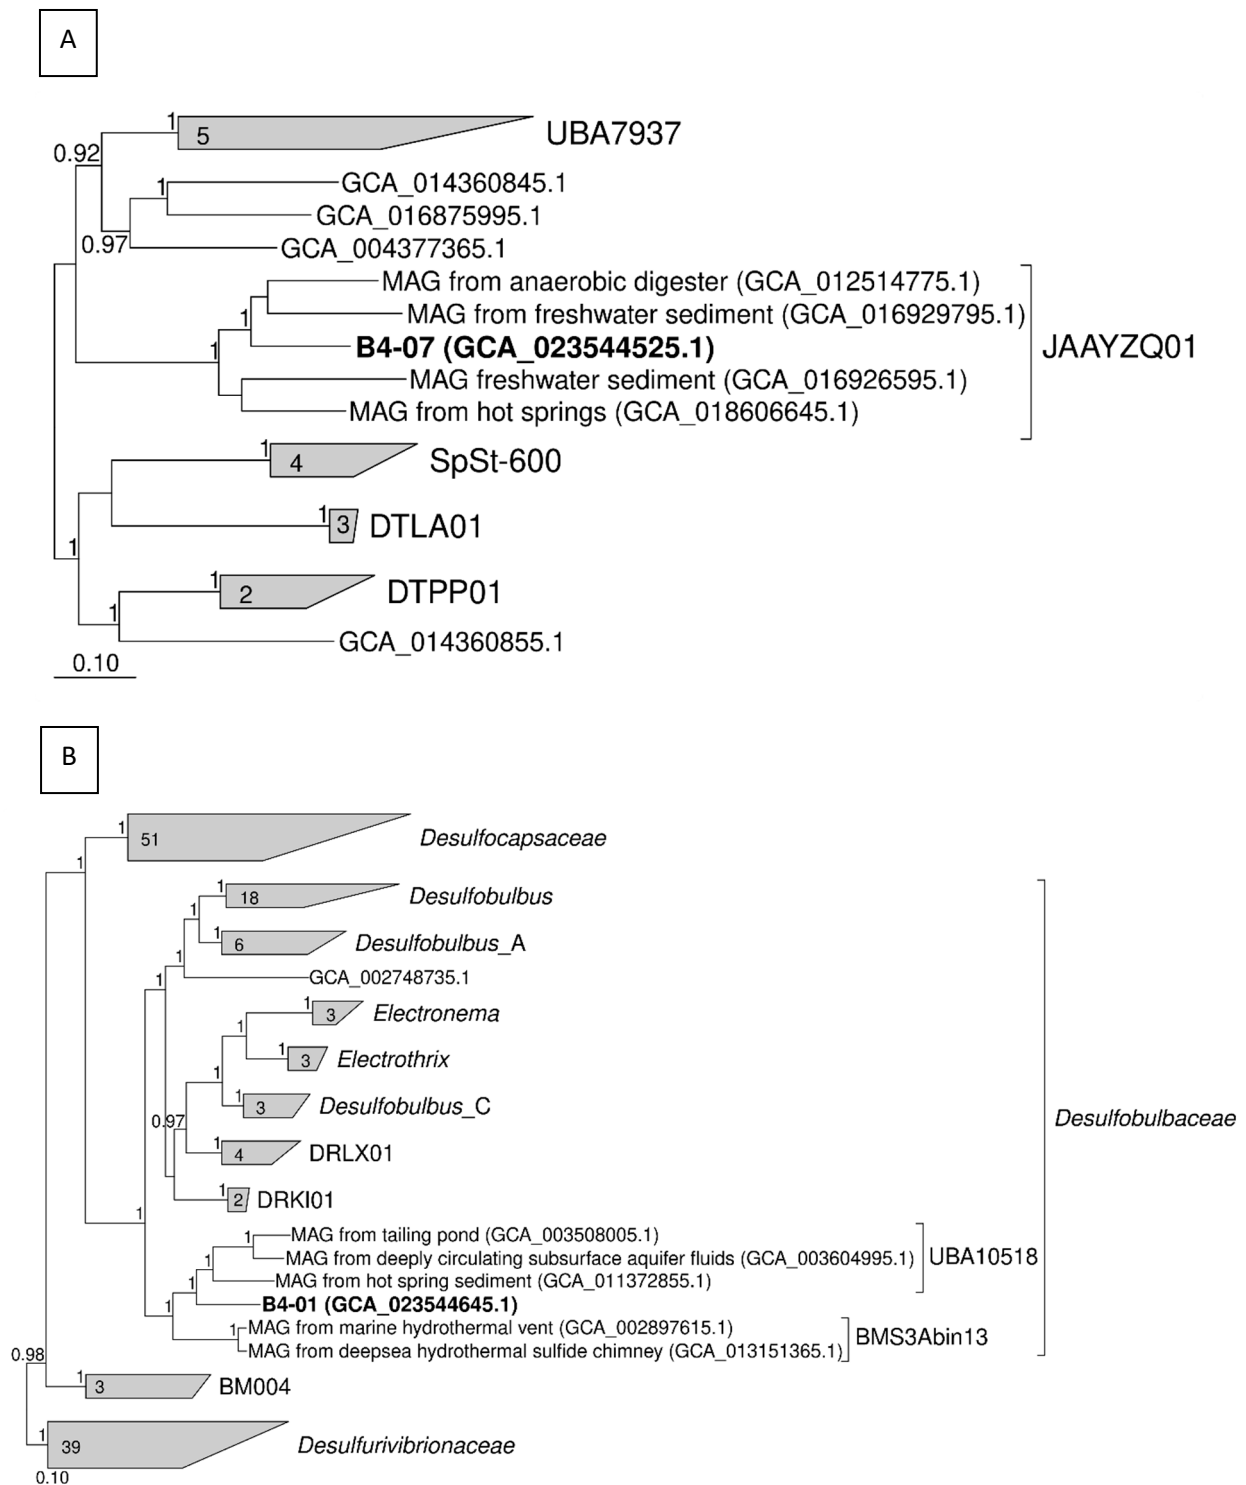

**Supplementary Figure S1.** Phylogenomic placement of B4-07 (A) and B4-01 (B) MAGs based on concatenated partial amino acid sequences of 120 bacterial single copy conserved marker genes with taxonomic designations according to the GTDB. The trees were built using the GTDB-Tk v2.1.1 (de\_novo\_wf) (Chaumeil et al., 2022). Bootstrap consensus tree is shown with values above 90% placed at the nodes. Bar, 0.1 changes per position.

1. Chaumeil, P.A.; Mussig, A.J.; Hugenholtz, P.; Parks, D.H.; GTDB-Tk v2: memory friendly classification with the genome taxonomy database. *Bioinformatics* **2022**, *38*, 5315-5316. doi: 10.1093/bioinformatics/btac672.
