# Supplementary material for: Composition and Metabolic Potential of Fe(III)-Reducing Enrichment Cultures of Methanotrophic ANME-2a Archaea and Associated Bacteria
Source: MDPI journal article supplement (doi:10.3390/microorganisms11030555), 2023-02-22
Supplement: s1 [file s1]

Supplementary Table S4. Multiheme c-type cytochromes encoded in MAG B4-01

| Locus tag  | RAST     | Length, aa | Number of heme <i>c</i> -binding motifs | Predicted cellular location |
|------------|----------|------------|-----------------------------------------|-----------------------------|
| MCL7489785 | peg.327  | 661        | 26                                      | TM                          |
| MCL7487723 | peg.544  | 486        | 5                                       | periplasm                   |
| MCL7487805 | peg.646  | 591        | 11                                      | TM                          |
| MCL7487986 | peg.855  | 388        | 6                                       | TM                          |
| MCL7486557 | peg.911  | 485        | 5                                       | TM                          |
| MCL7486741 | peg.1549 | 331        | 12                                      | periplasm                   |
| MCL7489107 | peg.2749 | 512        | 9                                       | periplasm                   |
| MCL7489124 | peg.2769 | 491        | 5                                       | TM                          |
| MCL7489194 | peg.2944 | 1621       | 32                                      | TM                          |
| MCL7487168 | peg.3064 | 879        | 8                                       | TM                          |
| MCL7489334 | peg.3203 | 214        | 5                                       | TM                          |
| MCL7487347 | peg.3561 | 339        | 9                                       | TM                          |
| MCL7489301 | peg.3163 | 307        | 10                                      | TM                          |
| MCL7489603 | peg.3685 | 576        | 14                                      | TM                          |
| MCL7489784 | peg.326  | 197        | 7                                       | TM                          |
| MCL7487979 | peg.845  | 405        | 16                                      | cytoplasm                   |
| MCL7488685 | peg.2020 | 349        | 8                                       | periplasm                   |
| MCL7489246 | peg.3006 | 1008       | 32                                      | periplasm                   |
| MCL7488076 | peg.1144 | 305        | 12                                      | periplasm                   |
| MCL7488953 | peg.2575 | 205        | 4                                       | TM                          |
| MCL7489214 | peg.2968 | 2354       | 39                                      | cytoplasm                   |
| MCL7488832 | peg.2332 | 259        | 7                                       | TM                          |
| MCL7489042 | peg.2679 | 184        | 4                                       | TM                          |
| MCL7488217 | peg.1300 | 2196       | 13                                      | TM                          |
| MCL7489249 | peg.3009 | 2072       | 35                                      | TM                          |
| MCL7488077 | peg.1145 | 267        | 12                                      | TM                          |
| MCL7489606 | peg.3689 | 265        | 12                                      | periplasm                   |
| MCL7489274 | peg.3040 | 275        | 11                                      | TM                          |
| MCL7487026 | peg.2483 | 176        | 4                                       | TM                          |
| MCL7489248 | peg.3008 | 709        | 4                                       | TM                          |
| MCL7486914 | peg.2110 | 637        | 10                                      | cytoplasm                   |
| MCL7487971 | peg.834  | 177        | 5                                       | periplasm                   |
| MCL7487543 | peg.255  | 474        | 8                                       | periplasm                   |
| MCL7487438 | peg.3756 | 227        | 6                                       | TM                          |
| MCL7487720 | peg.540  | 487        | 9                                       | periplasm                   |
| MCL7488952 | peg.2574 | 214        | 4                                       | TM                          |
| MCL7489062 | peg.2700 | 155        | 4                                       | TM                          |
| MCL7487248 | peg.3314 | 153        | 4                                       | TM                          |
| MCL7487466 | peg.3790 | 1294       | 13                                      | periplasm                   |
| MCL7488558 | peg.1875 | 481        | 4                                       | cytoplasm                   |
| MCL7487998 | peg.873  | 166        | 4                                       | TM                          |
| MCL7487433 | peg.3745 | 492        | 8                                       | periplasm                   |
| MCL7488635 | peg.1960 | 209        | 5                                       | TM                          |

\*TM – transmembrane
