# Supplementary material for: Composition and Metabolic Potential of Fe(III)-Reducing Enrichment Cultures of Methanotrophic ANME-2a Archaea and Associated Bacteria
Source: Microorganisms. 2023 Feb 22;11(3):555. doi: 10.3390/microorganisms11030555 (PMC10052568; doi:10.3390/microorganisms11030555)
Supplement: Supplementary file 1 [file microorganisms-11-00555-s001.zip]

Archive with 5 entries (5 files):
- Supplementary Figure S1.pdf
- Supplementary Table S1 Methyl genes.xlsx
- Supplementary Table S2 Cytochromes ANME.pdf
- Supplementary Table S3_gene_locus.xlsx
- Supplementary Table S4 Cytochromes B4-01.pdf
