# Supplementary material for: Composition and Metabolic Potential of Fe(III)-Reducing Enrichment Cultures of Methanotrophic ANME-2a Archaea and Associated Bacteria
Source: Microorganisms. 2023 Feb 22;11(3):555. doi: 10.3390/microorganisms11030555 (PMC10052568; doi:10.3390/microorganisms11030555)
Supplement: Supplementary file 1 [file microorganisms-11-00555-s001.zip › Supplementary Table S1 Methyl genes.xlsx]

## Sheet: Functional genes
Supplementary Table S1. The list of the genes of the enzymes responsible for utilization of methanol, methylamines and methoxylated aromatic compounds that were queried in this study
Gene	Enzyme	Gene	Reference organism / Sequence	Length, aa	Reference sequence
mtbC1	methanol methyltransferase		Methanosarcina MULTISPECIES	258	MLDFTEASLKKVLTRYNVALEKAMTPEDAAEELYPKDELIYPIAKAIFEGEEDDVIEGLEAAIKAGKDPI ALIDDALMVGMGVVTRLYDEGIIFLPNVMMSADAMLDGIEFCKENSETAPVTKGTVVCHVAEGDVHDIGK NIVTALLRANGYNVVDLGRDVPVDEVLNAVAENNPILVTGTALMTTTMYAFKEVNDKLLEKGYKIPFACG GGAVNQDFVSQYALGVYGEEAADAPKIADAIVAGTTDIAALRDKFHKH
mtaB	methanol-corrinoid methyltransferase		Moorella thermoacetica	496	MDYKPVKTFNELAIKSLDDFVYGIAPYPVRAKNGMVIGGGTVYPEVNMTLPPMNIDESTMPEVRKQYAEM FEGILKRAKELYAPGVILEVELLPETTMVPKWGREIIKILLDKMKDYEAKYGLKSLVRCTPNDTREMLRP PLMRRGELLDNILLTFEKCAEDGADILSIESTGGKELHDEALVNCDIRKAIFALGVLGVRDMRFLWSNIV SIAQKTGAIPGGDTACGFANTALALAEQGMIPRIFAAVDRVATIPRSLAAFEMGAVGPDKDCGYEGPYMK AIAGVPISMEGKTAACAHLSAVGNIAACVCDMWSNESVQNVRLLSAYAPVAYTEQLIYDCRLMNEAAADG RNYALKVRDWLANSDSKLDPQAYVLRPDIVLEISRELVKEKDAF…
mdh	methanol dehydrogenase		Methylococcus capsulatus	573	NSELDRLSKDDRNWVMQTKDYSATHFSRLTEINSHNVKNLKVAWTLSTGTLHGHEGAPLVVDGIMYIHTP FPNNVYAVDLNDTRKMLWQYKPKQNPAARAVACCDVVNRGLAYVPAGEHGPAKIFLNQLDGHIVALNAKT GEEIWKMENSDIAMGSTLTGAPFVVKDKVLVGSAGAELGVRGYVTAYNIKDGKQEWRAYATGPDEDLLLD KDFNKDNPHYGQFGLGLSTWEGDAWKIGGGTNWGWYAYDPKLDMIYYGSGNPAPWNETMRPGDNKWTMTI WGRDADTGRAKFGYQKTPHDEWDYAGVNYMGLSEQEVDGKLTPLLTHPDRNGLVYTLNRETGALVNAFKI DDTVNWVKKVDLKTGLPIRDPEYSTRMDHNAKGICPSAMGYHNQ…
mtmB	monomethylamine methyltransferase MtmB		IPR008031	145	IAGWACATISEFTDLMTGNQYYPCAGPCTEMCLLEAAAQSVTDTASGREILSGVASAKGVITDKTTGMEARMMGEVARATAGMDIDSVNAVLDKLVGSYEGDYATAPQGKTFQECYDVATVTPTDEYVKVYEGARKKLEEFGLTF
mtbB	dimethylamine methyltransferase MtbB		IPR012653	355	MATEYFLRMGDGAKIFMSKEDIMADIEAGCADAADLGTIPSLSEDEMEKMLDIITSPGRIVGVEPGMEVPVTHDIGAIRIDGDQGNSGVGIPASRLVGSMIHERAFGADTMELGHIDYSYKPVKPVISQEQQTMEVCQQNMVIPMLYGAMPNMGLYYTPDGPFENPGDLMKAFKISEAQESIQKAGDHGIRDMVWIMQRLQHVGCDGVNFDTIGAAGDGDAYASFNAIEALRKEFPNMYINAGMAGELVLGMHGELEYDGTVLAGLWPHEQVLLAAKAGANTFGPVCNTNTSKTSAWNLGRSVTFMKAAVEASPIPCHVDMGMGVGGIPMLETPPIDAVTRASKAMVEIAGVDGI
-	trimethylamine methyltransferase		IPR010426	522	MVTAETAIDKIAQPSRRERGGRNARREQRAHGAQGMGRPFIVRGIPPYDIMAEENLVRIEETADRILAEIGIEFRDDPVALELWRRAGAEIDGVLVKFEPGMLRELLATAPAEFTQHARNPARSVRVGGNNVVFSPAYGSPFVMDLDRGRRYGTIEDFRNFIKLAQSSPWLHHSGGTICEPVDVPVNKRHLDMVYSHIKYSDRAFMGSVTAESRAEDSIEMARIVFGRDFVDRNCVILGNVNVNSPLVWDGTMTLALRAYARANQAAVVVPFILGGAMGPVTNAGAIAQSLAETMAGCALTQLERPGAPVIFGNFLSSMSLRSGSPTFGTPEPAVGSMVVGQLARRLRLPLRCSGNFTTSKLPDAHAMNEGTMSMLAAVHCGANFILHSAGFLDGLLSM…
-	trimethylamine methyltransferase		Methanosarcina / IPR012740	333	MVEGMYPARFPLDGIQLELFSDDDMRAIHYASMEVFLNPGIQVSDPEARAIFKEAGCEVDEKTQVVKIPEFLVNRSLMDAPSRFLLYGRDKKKTVDMEHKGKVHYIPFGTGVKMCNYISPGKYETVDSVDQDIADTAKVCDYLDEFSYMSLTVSARDWAGKGAQDVHETLTPLAGTSKHFHHIDPVGENVEYYKGIVDAYYGGDSEEARKKPIMSMLLCPTSPLELSVNACQVIIKGARFGMPVNVLSMAMSGGSSPVFRAGTLVTHNAEILAGIVLAQLVQPGASVFYGSSTTTFDLRKGTAPVGAPELGLISAAVGKMGQYYGLPSYVAGT
mtoC	cobalamin-binding protein AF_0006		Archaeoglobus fulgidus	210	1 madvrkefvq aladldeakt veltkkrves gedpftiled vrkatdiigk rfeegryfvs 61 dlimageilk qvmeilrpll gekkaeskgk vvigtvegdv hdigknivia lleaegfevv 121 digvdqppea fveaanqhnp dvvglsgllt eaiesmkrtv ealrkagykg kiiigggrts 181 eeakeytgad dwaddaavgv rkikalvgve
mtoC	corrinoid protein WP_042685521 (MtoC)		Methermicoccus shengliensis	209	1 mtdvreelvn aladldeaka ieltkkrves gedpfailed vrkatdivgk rfeegryfvs 61 dlmmageilk qimdvvkpli gekagekkgk vvigtvegdv hdigksivia lleaegfevv 121 dlgvdqppev fvnavrehnp dvvglsgllt eaidsmkktv davkkeaevk iiigggrvde 181 eakeytgadd wtddaavgvr kikalvgve
mtoD	corrinoid activation protein AF_0010		Archaeoglobus fulgidus	597	1 mvsvtfepvg kkvedepdti leiarrngvl irsdcggkgv cgkckvvvvd yrgslsditd 61 herkhlieee iskgyrlacq arveegrati fippesrler rkvagltiek evelnpavrk 121 vyaeiqppsi edqlpdydrl tralgdfsld letlsempkl lreaewrvta tfwngrlidl 181 ekgdvsdrcy gvavdvgssk iichlvdlks getiatgysd npqvaygedi vsrityasks 241 aenrkrlqtv vvetvnqiia elcnesgvdl rhvyevmivg nsvmhhlffg ieprfigvsp 301 ftpavrrgvs fpaedvglri nrkgyvsslp lvagfvgada vani…
mtoD	Corrinoid activation proteinWP_042685513 (MtoD corrinoid protein activase)		Methermicoccus shengliensis	616	1 msvrvtfepa gkkietssnf ileiareanv slrsdcggkg vcgkcrvviv dargemsevn 61 everkhltpe eieagyrlac qakilsgrat ifmppesrme arkvaevave ekvelnpavk 121 kvhlrlrept ledvkpdfer lksalgevei plsllknlpk llreanwdit avlwngklig 181 iergdttnrs fglaidigss kvichlvdlv tgetiargya enpqvayged vvsrityask 241 sdenleklqr ivvevinkvi devcreagvs seevyeavvv gnsvmhhlff giypkyisvs 301 pftpavrkgi sypakeiglk insegyvssl pliagfvgad avsn…
