# Supplementary material for: Composition and Metabolic Potential of Fe(III)-Reducing Enrichment Cultures of Methanotrophic ANME-2a Archaea and Associated Bacteria
Source: Microorganisms. 2023 Feb 22;11(3):555. doi: 10.3390/microorganisms11030555 (PMC10052568; doi:10.3390/microorganisms11030555)
Supplement: Supplementary file 1 [file microorganisms-11-00555-s001.zip › Supplementary Table S3_gene_locus.xlsx]

## Sheet: OK
		Table S3. Genes involved in the main metabolic pathways
		Gene name	Gene associated Locus (NCBI PGAP)
		Genes related to carbon metabolism:
		Wood-Ljungdahl pathway
		Acetyl-CoA synthase corrinoid iron-sulfur protein, large subunit (gamma)	MCL7488799
		CO dehydrogenase/acetyl-CoA synthase, acetyl-CoA synthase subunit (EC 2.3.1.169)	MCL7488800
		CO dehydrogenase /acetyl-CoA synthase, CO dehydrogenase subunit (EC 1.2.7.4)	MCL7488802
		bifunctional 5,10-methylenetetrahydrofolate reductase (EC 1.5.1.20) / Acetyl-CoA synthase corrinoid iron-sulfur protein, small subunit (delta)	MCL7488801
		bifunctional methenyltetrahydrofolate cyclohydrolase (EC 3.5.4.9) / Methylenetetrahydrofolate dehydrogenase (NADP+) (EC 1.5.1.5)	MCL7488803
		formate dehydrogenase (EC 1.17.1.9)	MCL7488650-MCL7488652
		formate--tetrahydrofolate ligase (EC 6.3.4.3)	MCL7486993
		Glycolysis/gluconeogenesis via Embden–Meyerhof–Parnas pathway
		glucokinase (EC 2.7.1.2)	MCL7488152, MCL7488484
		glucose-6-phosphate isomerase (EC 5.3.1.9)	MCL7486756
		fructose 1,6-bisphosphatase (EC 3.1.3.11)	MCL7489607
		ATP-dependent 6-phosphofructokinase (EC 2.7.1.11)	MCL7488430
		fructose-bisphosphate aldolase (EC 4.1.2.13)	MCL7487667
		triose-phosphate isomerase (EC 5.3.1.1)	MCL7486897
		NAD-dependent glyceraldehyde-3-phosphate dehydrogenase (EC 1.2.1.12)	MCL7486798,
		phosphoglycerate kinase (EC 2.7.2.3)	MCL7486896
		2,3-bisphosphoglycerate-independent phosphoglycerate mutase (EC 5.4.2.12)	MCL7489469
		phosphopyruvate hydratase (EC 4.2.1.11)	MCL7486608
		pyruvate, phosphate dikinase (EC 2.7.9.1)	MCL7487189
		phosphoenolpyruvate synthase (EC 2.7.9.2)	MCL7486988
		bifunctional phosphoenolpyruvate synthase (EC 2.7.9.2) / pyruvate, phosphate dikinase (EC 2.7.9.1)	MCL7487063, MCL7487098
		Pentose phosphate pathway
		glucose-6-phosphate 1-dehydrogenase (EC 1.1.1.49)	MCL7488479, MCL7488743
		6-phosphogluconolactonase (EC 3.1.1.31)	MCL7488080
		6-phosphogluconate dehydrogenase, decarboxylating (EC 1.1.1.44)	MCL7488483, MCL7488063 , MCL7488742
		ribulose-phosphate 3-epimerase (EC 5.1.3.1)	MCL7486755
		ribose-5-phosphate isomerase B (EC 5.3.1.6)	MCL7489288
		transketolase (EC 2.2.1.1)	MCL7488478, MCL7488504, MCL7488927
		transaldolase (EC 2.2.1.2)	MCL7486951
		Genes related to tricarboxylic acid cycle
		citrate synthase (si) (EC 2.3.3.1)	MCL7488040 , MCL7486809
		aconitate hydratase (EC 4.2.1.3)	MCL7489680
		isocitrate dehydrogenase (NADP) (EC 1.1.1.42)	MCL7489157
		2-Oxoglutarate dehydrogenase complex	MCL7488424- MCL7488426, MCL7489290- MCL7489291
		succinyl-CoA ligase [ADP-forming] (EC 6.2.1.5)	MCL7487270 - MCL7487271
		succinate Dehydrogenase (EC 1.3.5.1)	MCL7488241 - MCL7488243
		fumarate hydratase (EC 4.2.1.2)	MCL7486677- MCL7486678, MCL7487371
		malate dehydrogenase (EC 1.1.1.37)	MCL7488593
		Genes related to hydrogen metabolism:
		hydrogenase nickel incorporation protein HypB	MCL7486625
		hydrogenase maturation nickel metallochaperone HypA	MCL7486626
		HyaD/HybD family hydrogenase maturation endopeptidase	MCL7486627
		Ni/Fe-hydrogenase, b-type cytochrome subunit	MCL7486628
		Ni/Fe-hydrogenase large subunit	MCL7486629
		Ni/Fe-hydrogenase small subunit	MCL7486630
		[NiFe] hydrogenase metallocenter assembly protein HypE	MCL7486631
		[NiFe] hydrogenase metallocenter assembly protein HypD	MCL7486632
		HypC/HybG/HupF family hydrogenase formation chaperone	MCL7486633
		[NiFe] hydrogenase metallocenter assembly protein HypF	MCL7486634
		sulfhydrogenase subunit alpha (EC 1.12.1.5)	MCL7488053
		sulfhydrogenase subunit delta (EC 1.12.1.5)	MCL7488054
		sulfhydrogenase subunit gamma (EC 1.12.98.4)	MCL7488055
		sulfhydrogenase subunit beta (EC 1.12.98.4)	MCL7488056
		Ni-Fe hydrogenase complex transmembrane adaptor subunit HycС/HyfB	MCL7487172
		Ni-Fe hydrogenase complex small subunit hycG/hyfI	MCL7487173
		Ni-Fe hydrogenase complex large subunit hycE/hyfG	MCL7487174
		Ni-Fe hydrogenase complex subunit HyfF	MCL7487175
		Ni-Fe hydrogenase complex subunit HyfE	MCL7487176
		Ni-Fe hydrogenase complex subunit HycD/HyfC	MCL7487177
		Genes related to energy conservation and electron-transport chain
		Na+-translocating NADH-quinone reductase (EC 7.2.1.1)	MCL7487155- MCL7487160
		H+ F1Fo-ATP synthase (EC 7.1.2.2)
		Fo complex subunits a and c	MCL7486782, MCL7486783
		Fo complex subunits b'/b	MCL7486842-MCL7486843
		F1 complex	MCL7486844-MCL7486848
		V-type ATP synthase subunits IKE and subunitsABD	MCL7486812-MCL7486814, MCL7486817-MCL7486819
		Na+ H+ antiporter subunits EGBBCDAH	MCL7488259-MCL7488269
		Na+ H+ antiporter subunit ADCBG	MCL7487250-MCL7487256
		Genes related to sulfate reduction:
		sulfate adenylyltransferase (EC 2.7.7.4)	MCL7488673
		adenylyl-sulfate reductase subunit A (EC 1.8.99.2)	MCL7488023
		adenylyl-sulfate reductase subunit B (EC 1.8.99.2)	MCL7488024
		manganese-dependent inorganic pyrophosphatase (EC 3.6.1.1)	MCL7488557
		dissimilatory sulfite reductase, alpha subunit DsrA (EC 1.8.99.5)	MCL7486757
		dissimilatory sulfite reductase, beta subunit DsrB (EC 1.8.99.5)	MCL7486758
		sulfur redox associated protein DsrC	MCL7488017
		sulfate reduction electron transfer complex DsrMKJOP	MCL7486924-MCL7486928
		electron transfer complex QmoABC	MCL7488020-MCL7488022
		dissimilatory sulfite reductase D family protein DsrD	MCL7486759
		Genes related to arsenate reduction:
		anaerobic respiratory reductaseTorD family chaperone	MCL7488708
		respiratory arsentate reductase, FeS subunit, ArrB	MCL7488709
		respiratory arsenate reductase, molybdopterin- binding subunit, ArrA	MCL7488710
		arsenate reductase ArsC (EC 1.20.4.4)	MCL7488997
		ACR3 family arsenite efflux transporter	MCL7488996
		Genes related to nitrogen metabolism:
		P-II family nitrogen regulator	MCL7486730-MCL7486731, MCL7488792
		ammonium transporter	MCL7488793 , MCL7487342
		respiratory FeMo-cofactor scaffold and assembly protein NifB	MCL7486727 , MCL7489152
		nitrogenase (molybdenum-iron) beta chain (EC 1.18.6.1)	MCL7486728
		nitrogenase (molybdenum-iron) alpha chain (EC 1.18.6.1)	MCL7486729
		respiratory (molybdenum-iron) reductase and maturation protein NifH	MCL7486732
		nitrogenase (molybdenum-iron)-specific transcriptional regulator NifA	MCL7486733
		nitrogenase FeMo-cofactor scaffold and assembly protein NifE	MCL7489150
		nitrogenase FeMo-cofactor scaffold and assembly protein NifN	MCL7489151
		nitric-oxide reductase NorBC (EC 1.7.99.7)	MCL7489187 - MCL7489188
		nitric oxide reductase activation protein NorQD	MCL7489264- MCL7489265
